# Supplementary material
Source: ML conference proceedings conference paper supplement (https://openreview.net/forum?id=WNHNfkulYA)

# Word Distribution by Category

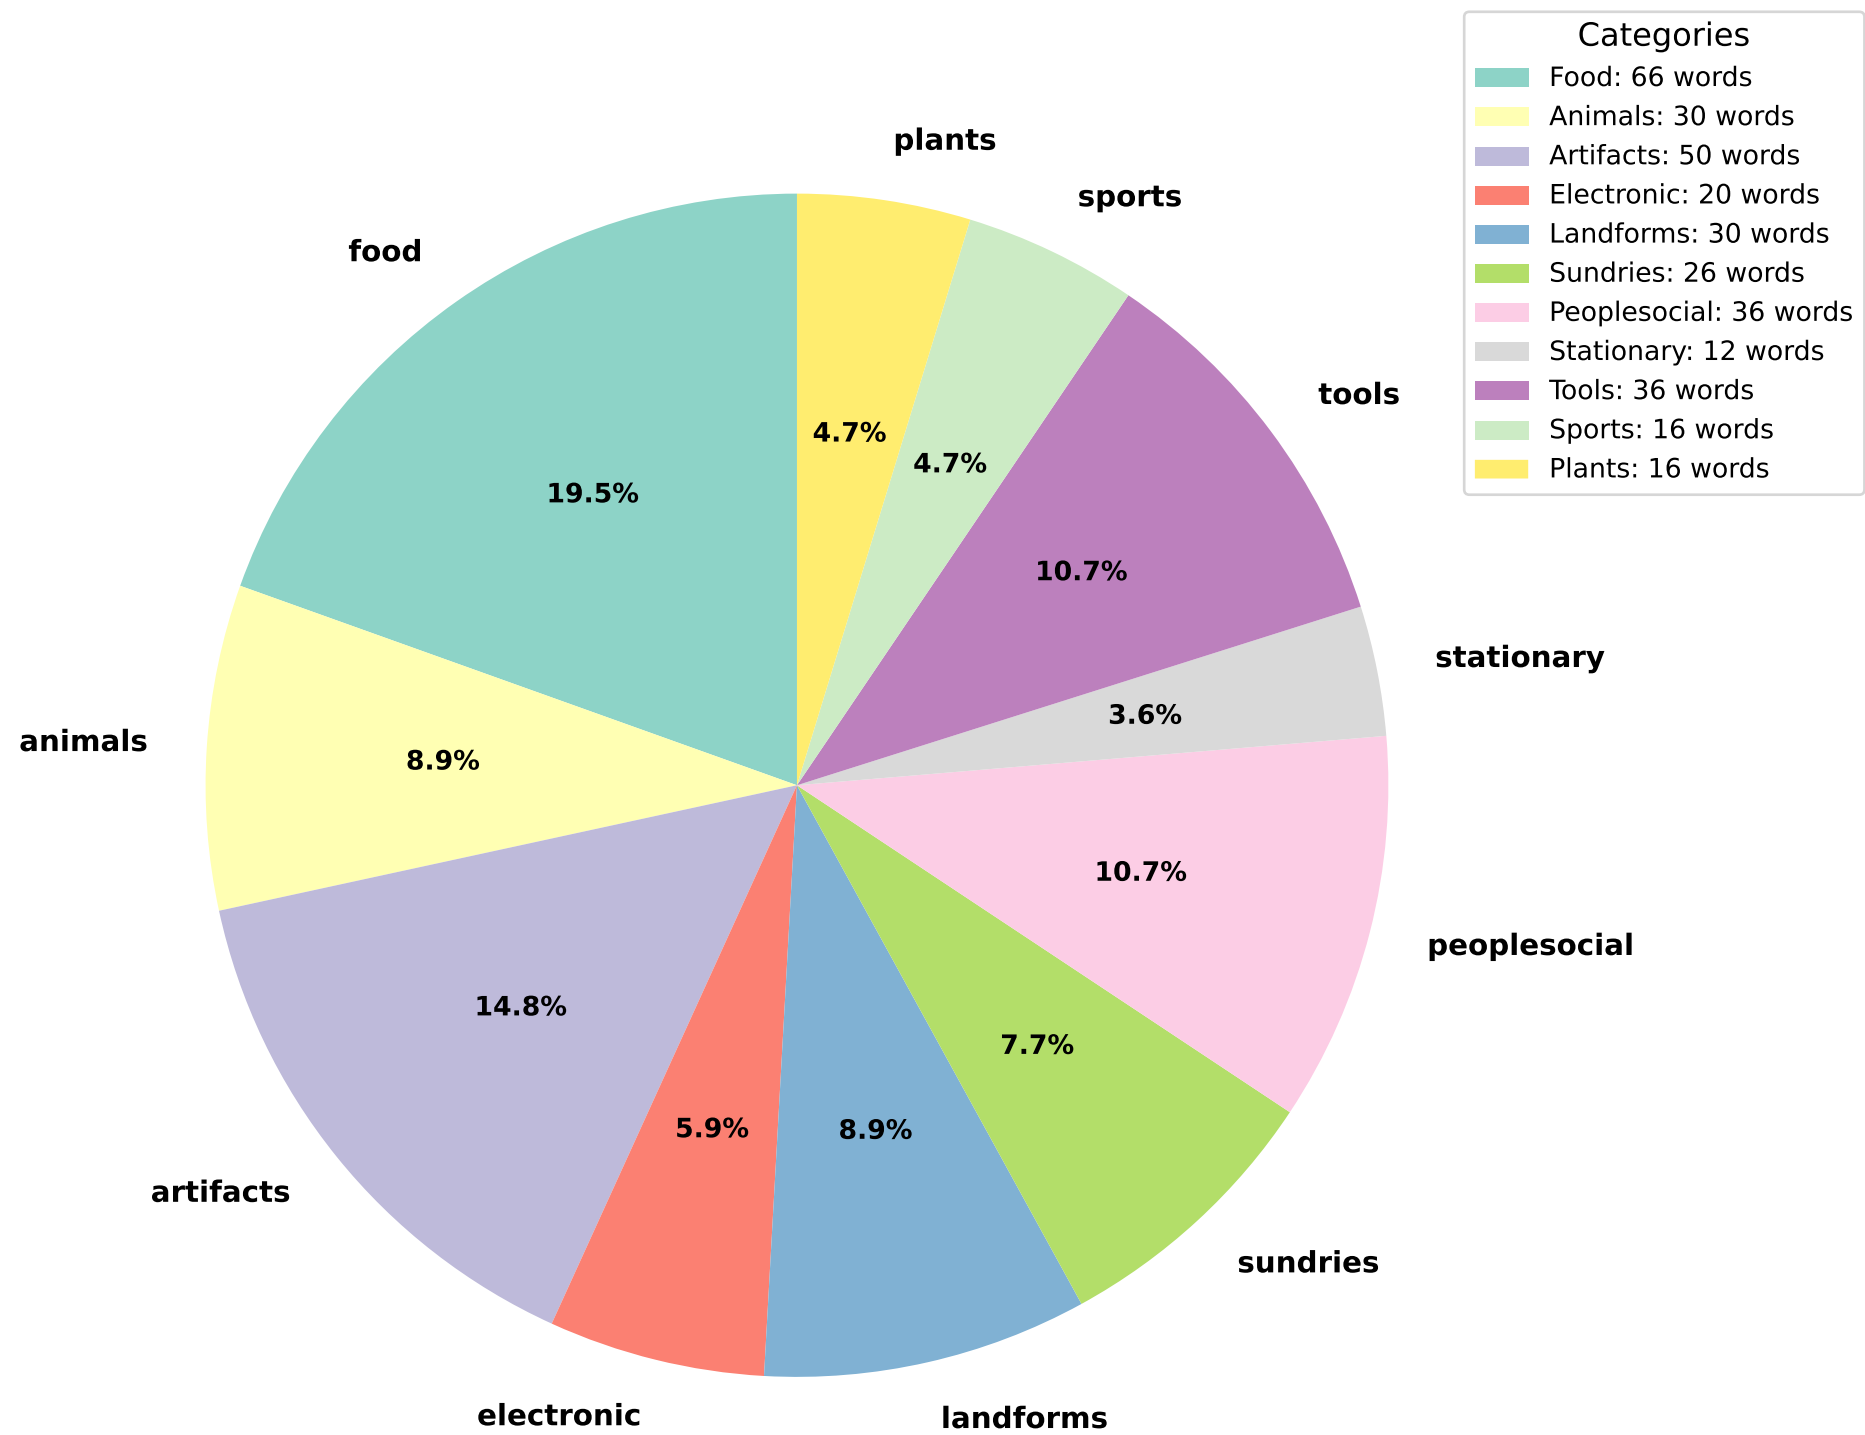

# Word Count by Category

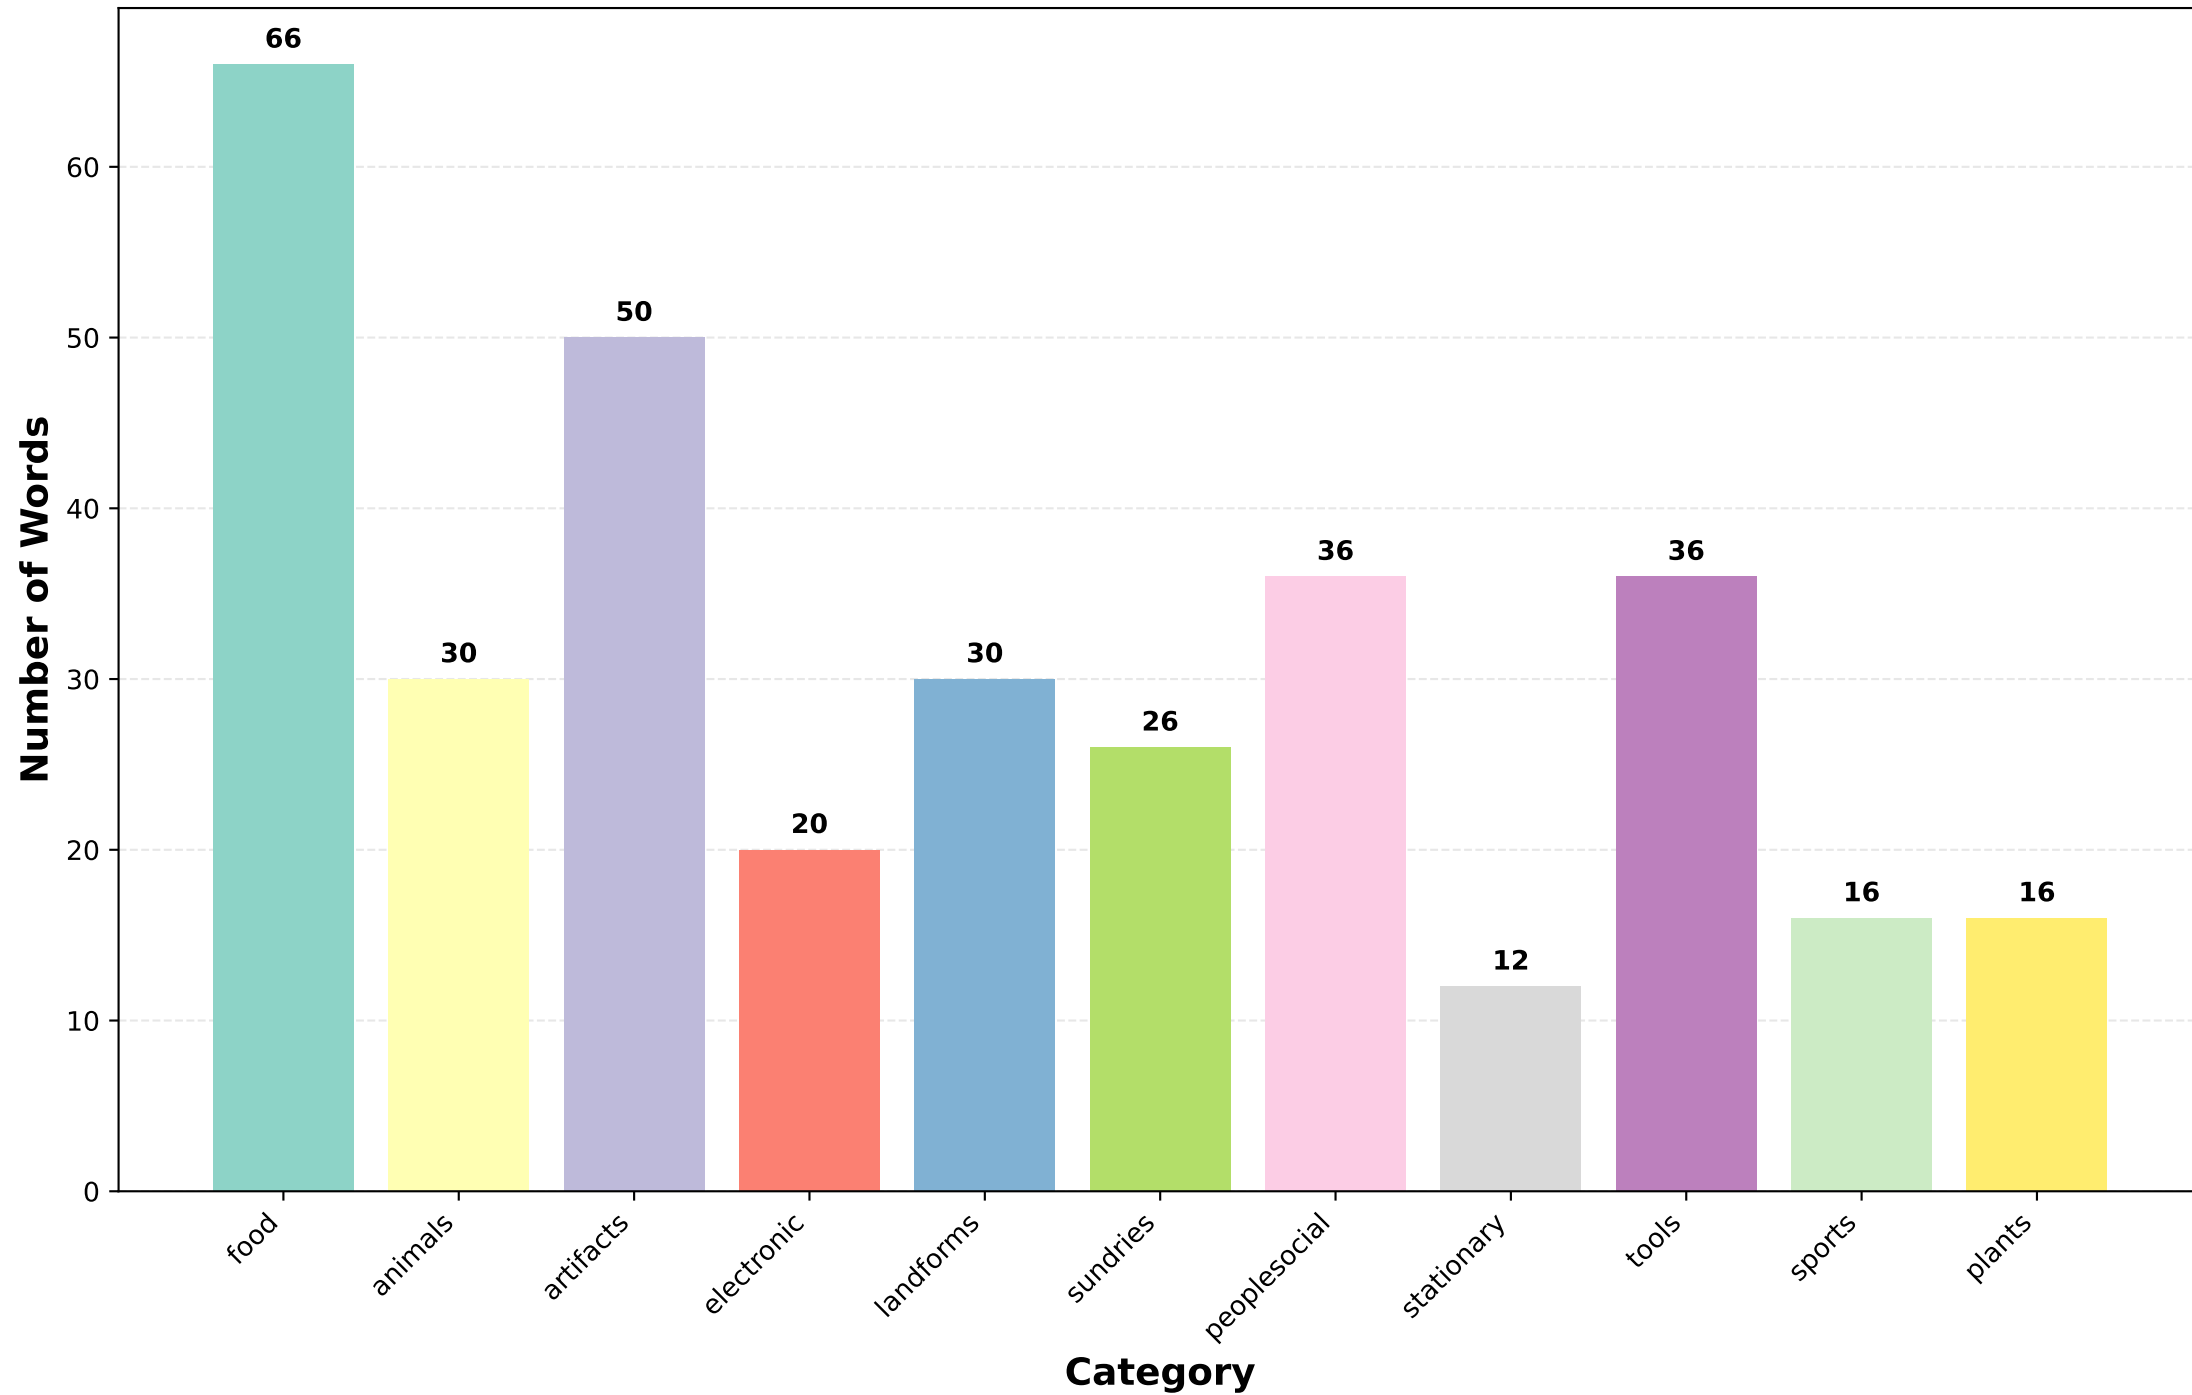

Supplement: supplementary_material [file data_distribution.pdf › data_distribution.pdf]
